# Supplementary material
Source: Research Square preprint supplement (doi:10.21203/rs.3.rs-8473180/v1)
Supplement: Supplementary file 1 [file 4685641faeb550348804b5f8.docx]

Highlights

Using qualitative data and a phenomenological methodology, the study examines the efficacy accessibility, distribution, and food aid provided by food services after earthquakes in Türkiye. It covers the victims' issues with food security, food services, and their opinions on potential solutions. To guarantee preparation acted communities receive sufficient and culturally relevant nutritional support, it is crucial to create more efficient, accessible, and sustainable food services in earthquake situations, disaster preparedness plans, and comprehensive food security policies.
