# Supplementary material
Source: Research Square preprint supplement (doi:10.21203/rs.3.rs-8473180/v1)
Supplement: Supplementary file 2 [file acaa6052aa9a47af4434924f.pdf]

## SUPPLEMENT-2 SEMI-STRUCTURED INTERVIEW FORM

Number:.....

Date.....

1. Age:.....
2. Gender:.....
3. Educational Status:.....
4. Family Members:.....
5. Number of Children:..... Children's Educational Status.....
6. What does the earthquake mean to you?
7. Can you talk about how the earthquake affected your life?
8. Can you talk about how the earthquake affected your family?
9. Can you describe the impact of the earthquake on meeting your nutritional needs in one word?
10. In the first 72 hours after the earthquake, which nutritional needs did you require most? What is the level of fulfillment of your nutritional needs? Explain with examples.
11. After 72 hours following the earthquake, which nutritional needs did you require most? What is the level of fulfillment of your nutritional needs?
12. What did you do to minimize the negative effects of the earthquake on your nutritional needs? What were your efforts, if any?
13. What would you recommend to minimize the negative effects of the earthquake on your nutritional needs?
14. Which nutritional service measure(s) would have prevented you from remaining a disaster victim?
15. What changes occurred in your nutritional needs and eating culture after the earthquake? If so, were you able to adapt to these changes? Explain with examples.
16. Which official, private, and civil society institutions and organizations did you receive the most help from in meeting your nutritional needs?
17. How many hours after the earthquake did you meet your nutritional needs? What difficulties did you experience?
18. Did your diet and eating habits change 72 hours after the earthquake? Which foods changed? Explain with examples.
19. What are your expectations and suggestions regarding nutritional services during the earthquake?

20. In disaster situations like earthquakes, what measures did you decide to take for your nutritional needs?

| Foods                    | Access Foods After 72h Disaster |          |      |
|--------------------------|---------------------------------|----------|------|
|                          | Easy                            | Moderate | Hard |
| Bread                    |                                 |          |      |
| Cheese                   |                                 |          |      |
| Marmalade                |                                 |          |      |
| Butter                   |                                 |          |      |
| Rice                     |                                 |          |      |
| Canned Bean              |                                 |          |      |
| Sugar                    |                                 |          |      |
| Wheat flour              |                                 |          |      |
| Wheat                    |                                 |          |      |
| Lentil                   |                                 |          |      |
| Sunflower /Corn oil      |                                 |          |      |
| Biscuits                 |                                 |          |      |
| Snacks                   |                                 |          |      |
| Pasta                    |                                 |          |      |
| Chickpea                 |                                 |          |      |
| Instant Soup             |                                 |          |      |
| Infant formula           |                                 |          |      |
| Ready prepared foods     |                                 |          |      |
| Fast food                |                                 |          |      |
| Canned vegetable         |                                 |          |      |
| Canned meat              |                                 |          |      |
| Onion                    |                                 |          |      |
| Potato                   |                                 |          |      |
| Green vegetables         |                                 |          |      |
| Hazır Besinler           |                                 |          |      |
| Gluten-free foods        |                                 |          |      |
| Drinking water           |                                 |          |      |
| Milk                     |                                 |          |      |
| Concentrated fruit juice |                                 |          |      |
